# Supplementary material for: Controlled strategy to synthesize SnO2 decorated SnS2 nanosheets with enhanced visible light photocatalytic activity
Source: Royal Society of Chemistry journal article supplement (doi:10.1039/c2ce25309g), 2012-01-01
Supplement: c2ce25309g.pdf [file c2ce25309g.pdf]

## **Electronic Supplementary Information**

# **Controlled Synthesis of SnO<sub>2</sub> Decorated SnS<sub>2</sub> Nanosheets with Enhanced Visible Light Photocatalytic Activity**

Xianlong Zhou, Tengfei Zhou, Juncheng Hu\* and Jinlin Li

Key Laboratory of Catalysis and Materials Science of the State Ethnic Affairs  
Commission & Ministry of Education, Hubei Province, South-Central University  
for Nationalities, Wuhan, 430074, People's Republic of China

\*E-mail: [junchenghuhu@hotmail.com](mailto:junchenghuhu@hotmail.com)

**Table S1** Composition of the SnS<sub>2</sub>@SnO<sub>2</sub> NCs synthesized in binary solvent

| Sample | V <sub>ani</sub> (mL) | V <sub>eth</sub> (mL) | V <sub>ani</sub> / V <sub>eth</sub> | SnO <sub>2</sub> molar fraction |
|--------|-----------------------|-----------------------|-------------------------------------|---------------------------------|
| a      | 20                    | 40                    | 33.3%                               | 29.3%                           |
| b      | 30                    | 30                    | 50.0%                               | 44.5%                           |
| c      | 40                    | 20                    | 66.6%                               | 62.1%                           |

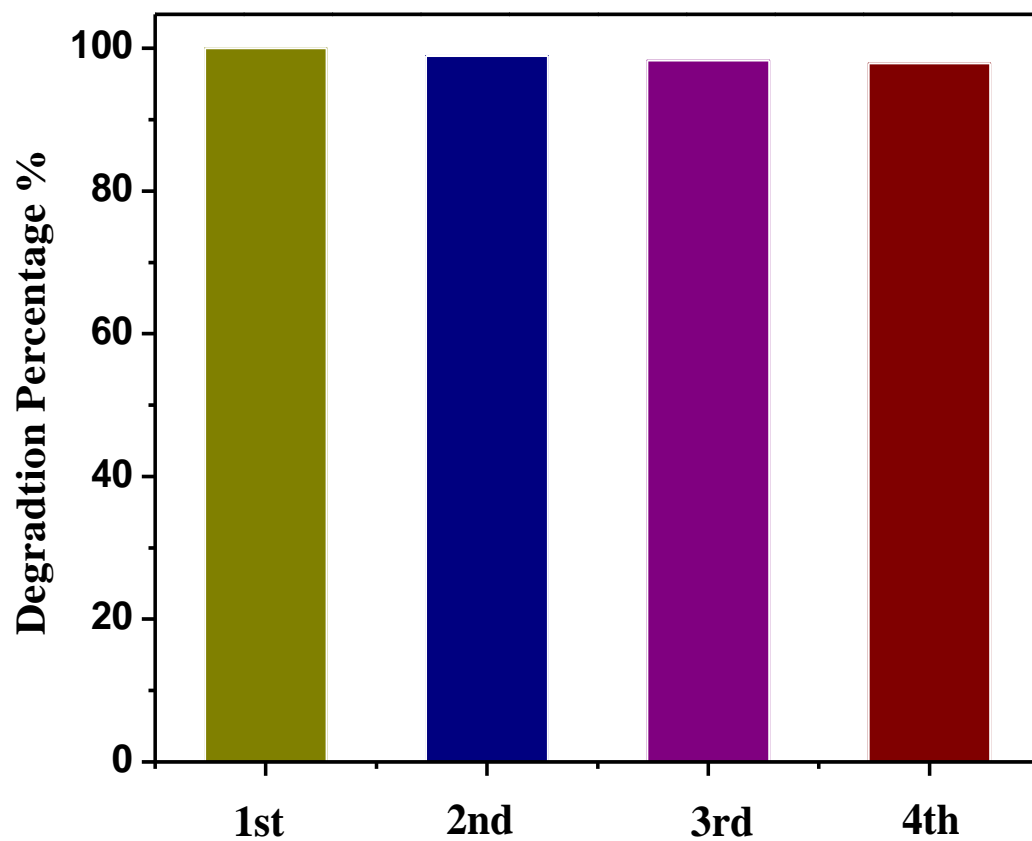

**Fig. S1** Degradation percentage of the MO in the presence of SnS<sub>2</sub>@SnS<sub>2</sub>-2 powder (50 mg ) under visible light ( $\lambda > 420$  nm ) irradiation after 45min

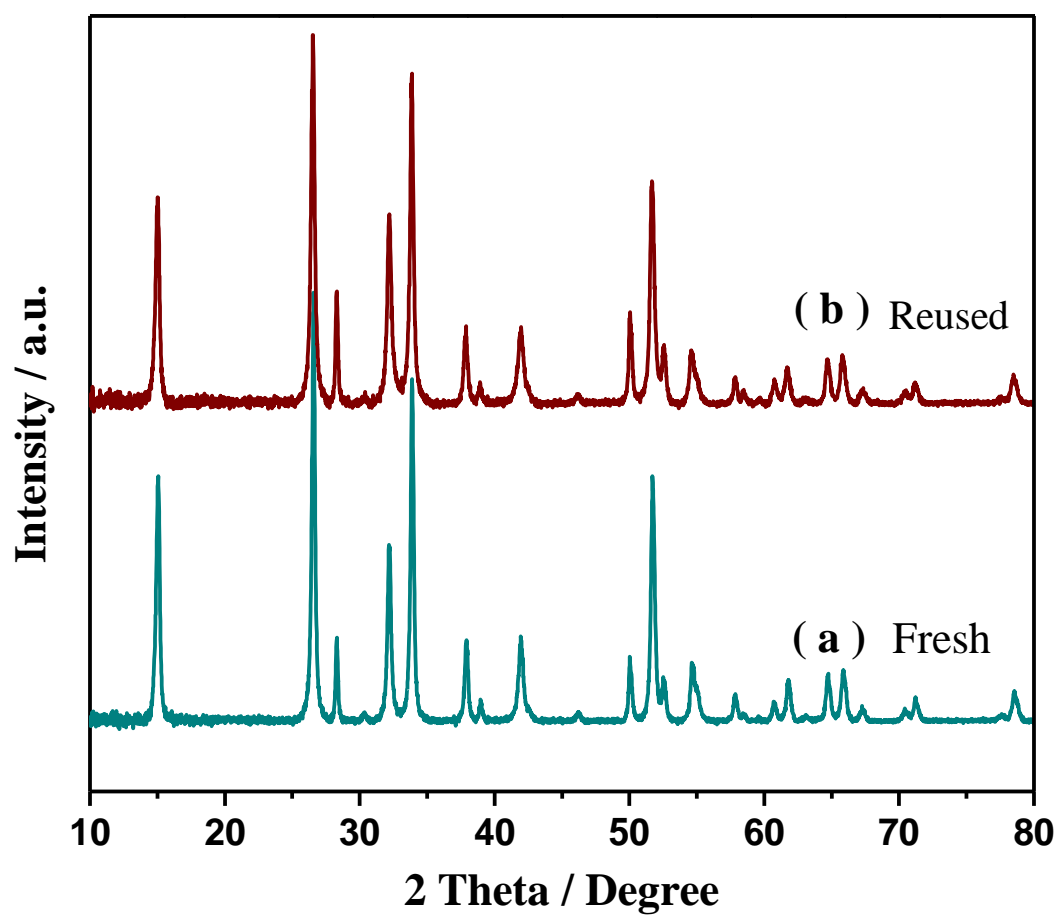

**Fig. S2** XRD patterns of (a) fresh  $\text{SnS}_2@\text{SnO}_2\text{-2}$  catalyst and (b) reused  $\text{SnS}_2@\text{SnO}_2\text{-2}$  catalyst for four times.

**Table S2** Crystallite size and surface area of SnS<sub>2</sub>, SnO<sub>2</sub> and SnS<sub>2</sub>@SnO<sub>2</sub>.

| Samples                                                   | Crystallite size of SnO <sub>2</sub> (nm) | Crystallite size of SnS <sub>2</sub> (nm) | BET surface area (g/m <sup>2</sup> ) |
|-----------------------------------------------------------|-------------------------------------------|-------------------------------------------|--------------------------------------|
| SnS <sub>2</sub>                                          |                                           | 13.2                                      | 41.83                                |
| SnO <sub>2</sub>                                          | 24.9                                      |                                           | 15.45                                |
| SnS <sub>2</sub> @SnO <sub>2</sub><br>(Veth / Vani = 1:2) | 24.9                                      | 23.8                                      | 17.69                                |
